# Supplementary material for: Clinical Significance of Polymorphisms in Immune Response Genes in Hepatitis C-Related Hepatocellular Carcinoma
Source: PubMed Central journal article supplement (PMC6429030; doi:10.3389/fmicb.2019.00475), 2019-03-15
Supplement: Data_Sheet_1.pdf [file Data_Sheet_1.pdf]

**Suppl. table 1**

Sequences of primers used for genotyping.

| GENE  | SNPs                | Chromosome /position         | Primers/Probes                                                                                                                                                                                                                                                                                                                                                                                                                                                                                                                                                                                                                                                                                                                                                                                                                                                                                                                                                     |
|-------|---------------------|------------------------------|--------------------------------------------------------------------------------------------------------------------------------------------------------------------------------------------------------------------------------------------------------------------------------------------------------------------------------------------------------------------------------------------------------------------------------------------------------------------------------------------------------------------------------------------------------------------------------------------------------------------------------------------------------------------------------------------------------------------------------------------------------------------------------------------------------------------------------------------------------------------------------------------------------------------------------------------------------------------|
| PDCD1 | rs36084323 (PD-1.1) | 2/242801596 G>A              | <p>Forward primer: TCTAGCCTCGCTTCGGTTAT</p> <p>Reverse primer: CTCACTGCTGTGGCCTCTTT</p> <p><u>TCTAGCCTCGCTTCGGTTATTTTAAGCTGATGAGCCTGACGCATCTCATCTACTAATATCAGCAGTTTCATTTCTCTGTTTTTC</u><br/> <u>CATTCGCTGTAATAAAATGCTCAGCACAGAATACAAGGAGATAAGCAAGCCATTTACAAAACGCCGGGCCAGCCAGGCC</u><br/> <u>AGGCACTGGACCCCTGAACCACCCACCCCTGGCACGAGTGGGCTGGAGGGCAGGGCCCCGGGAAGAAGGTCAAGGCTGGAA</u><br/> <u>GGGGAGGTCAGCCTCACAGCCAGCCCTGCCACCGCCCCAGCCCCCGTTCAGGCTGTTGCAGGCATCACACGGTGGAAAGAT</u><br/> <u>CTGGAACTGTGGCCATGGTGTGAGGCCATCCACAAGGTGGAAGCTTTGAGGGGGAGCCGATTAGCCATGGACAGTTGTCATTC</u><br/> <u>AGTAGGGTCACTGTGCCCCAGCGAAGGGGGATGGGGC [A/G] GGAAGGCAGAGGCCAGGCACCTGCCCCAGCAGGGGCAGA</u><br/> <u>GGCTGTGGGCAGCCGGGAGGCTCCAGAGGCTCCGACAGAATGGGAGTGGGGTTGAGCCCACCCCTCACTGCAGCCCAGGAAC</u><br/> <u>CTGAGCCCAGAGGGGGCCACCCACCTTCCCCAGGCAGGGAGGGCCCGCCCCAGGGAGATGGGGGGGATGGGGGAGGAGAAGG</u><br/> <u>GCCTGCCCCACCCGGCAGCCTCAGGAGGGGCAGCTCGGGCGGGATATGGAAAGAGGCCACAGCAGTGAG</u></p> |
| PDCD1 | rs10204525 (PD-1.6) | 2/241850169 G>A              | <p>Forward primer: GAAGTTTCAGGGAAGGTCAG</p> <p>Reverse primer: CAGTGTGTGGATGTGAGGAG</p> <p><u>GAAGTTTCAGGGAAGGTCAGAAGAGCTCCTGGCTGTGGTGGGCAGGCAGGAAACCCCTCCACCTTTACACATGCCAGGCAG</u><br/> <u>CACCTCAGGCCCTTTGTGGGCAGGGAAGCTGAGGCAGTAAGCGGCAGGCAGAGCTGGAGGCCCTTTCAGGCCAGCCAGCAC</u><br/> <u>TCTGGCCTCCTGCCCGGCATTCCACCCAGCCCTCACACCACTCGGGAGAGGGACATCCTACGGTCCCAAGGTCAGGAGGG</u><br/> <u>CAGGGCTGGGGTTGACTCAGGCCCTCCAGCTGTGGCCACCTGGGTGTTGGGAGGGCAGAAGTGCAGGCACCTAGGGCCCCC</u><br/> <u>CAT [A/G] TGCCCCACCTGGGAGCTCTCCTTGGAACCCATTCTTAAAGGGGTTGGCCGGGCTCCCACAGGGC</u><br/> <u>CTGGGTGGGAAGGTACAGGCGTTCCCCCGGGCCTAGTACCCCCGCGTGGCCTATCCACTCCTCACATCCACACTG</u></p>                                                                                                                                                                                                                                                                                                    |
| IL28B | rs12979860          | 19/39248147 C>T              | <p>Custom TaqMan SNP-genotyping</p> <p>Context Sequence [VIC/FAM]</p> <p><u>TGAACCAGGGAGCTCCCCGAAGGCG [C/T] GAACCAGGGTTGAATTGCACTCCGC</u></p>                                                                                                                                                                                                                                                                                                                                                                                                                                                                                                                                                                                                                                                                                                                                                                                                                      |
| TLR2  | rs111200466         | 4/153684312 _153684334 del23 | <p>Forward primer: CTCGGAGGCAGCGAGAAA</p> <p>Reverse primer: CTGGGCCGTGCAAAGAAG</p> <p><u>CTCGGAGGCAGCGAGAAAAGCGCAGC [-/CAGGCGGCTGCTCGGGCTTCTCT] CAGGTGACTGCTCGGAGTTCTCCCAGGTACG</u><br/> <u>TCGTGCGCTCCCCACTCGTGTGGTCTCTCTGCACCCCTTCTTGGGGTTCGGGTCGGGCAGGGGCGGAGGGGAGCCGAGCCCCG</u><br/> <u>TCACGGGCTCTGGGGAACCCGGGCTCCCGTTTCGGCTGCACCTGGGCCCTAGCTCCTGTCCGGGCGGGGATAGCGGGAAGCGC</u><br/> <u>ACCAGGCCCCGGGACGCCGGTGCTTCTTTGCACGGCCAG</u></p>                                                                                                                                                                                                                                                                                                                                                                                                                                                                                                                       |

SNPs single nucleotide polymorphisms

**Suppl. Figure 1**

**Gel electrophoresis of rs111200466 TLR2 polymorphisms.**

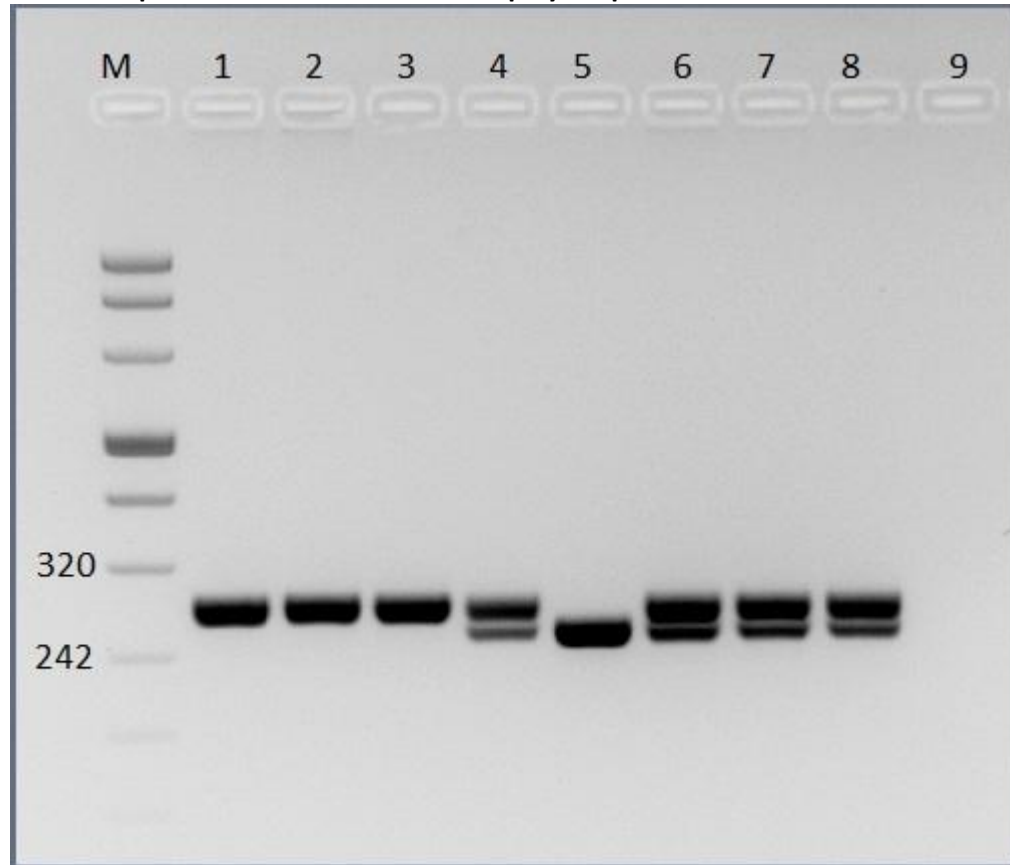

Agarose gel electrophoresis stained with ethidium bromide showing the amplification of the-196 to-174 del/ins polymorphism of toll-like receptor 2. M Marker, Lanes 1,2 and 3: PCR product of 286bp homozygous (ins/ins) genotype, Lanes 4, 6,7 and 8: PCR product of 286bp and 264bp heterozygous (ins/del) genotype, Lane 5: PCR product of 264bp homozygous (del/del) genotype, Lane 9 negative control.
